# Supplementary material for: Epithelial Cell Adhesion Molecule (EpCAM) Expression in Human Tumors: A Comparison with Pan-Cytokeratin and TROP2 in 14,832 Tumors
Source: MDPI journal article supplement (doi:10.3390/diagnostics14101044), 2024-05-17
Supplement: s1 [file s1]

| Organ system                  | Cell type              | EpCAM staining                                                                                                                       |
|-------------------------------|------------------------|--------------------------------------------------------------------------------------------------------------------------------------|
| <b>Brain</b>                  | Cerebrum               | Negative.                                                                                                                            |
|                               | Cerebellum             | Negative.                                                                                                                            |
| <b>Endocrine Tissues</b>      | Thyroid                | Strong staining (+++) in epithelial cells.                                                                                           |
|                               | Parathyroid            | Strong staining (+++) in epithelial cells.                                                                                           |
|                               | Adrenal gland          | Weak (+) to moderate (++) membranous staining of adrenocortical cells                                                                |
|                               | Pituitary gland        | Strong staining (+++) in epithelial cells of the adenohypophysis. Negative in neurohypophysis.                                       |
| <b>Respiratory system</b>     | Respiratory epithelium | Strong (+++) staining of eptelial cells, with lowest staining (+) in basal cell layers.                                              |
|                               | Lung                   | Weak (+) to moderate (++) staining of pneumocytes.                                                                                   |
| <b>Gastrointestinal Tract</b> | Salivary glands        | Strong staining (+++) in epithelial cells.                                                                                           |
|                               | Esophagus              | Strong staining (+++) in epithelial cells.                                                                                           |
|                               | Stomach                | Strong staining (+++) in epithelial cells. Weak staining (+) of parietal cells of the stomach, limited to the basolateral membranes. |
|                               | Duodenum               | Strong staining (+++) in epithelial cells and Brunner's glands.                                                                      |
|                               | Small intestine        | Strong staining (+++) in epithelial cells.                                                                                           |
|                               | Colon                  | Strong staining (+++) in epithelial cells.                                                                                           |
|                               | Rectum                 | Strong staining (+++) in epithelial cells.                                                                                           |
|                               | Liver                  | Strong staining (+++) in epithelial cells of bile ducts. Hepatocytes are negative.                                                   |
|                               | Gallbladder            | Strong staining (+++) in epithelial cells of the gallbladder and bile ducts.                                                         |
|                               | Pancreas               | Strong staining (+++) in epithelial cells.                                                                                           |

|                       |                     |                                                                                                                                                                                             |
|-----------------------|---------------------|---------------------------------------------------------------------------------------------------------------------------------------------------------------------------------------------|
| <b>Genitourinary</b>  | Kidney              | Strong staining (+++) in distal tubuli, less intense (++) and focused to the basolateral membranes in the proximal tubuli. Staining (++) of the epithelial cells lining the Bowman capsule. |
|                       | Urothelium          | Strong staining (+++) in urothelium, but sometimes less intense in umbrella cells.                                                                                                          |
| <b>Male genital</b>   | Prostate            | Strong staining (+++) in epithelial cells.                                                                                                                                                  |
|                       | Seminal vesicles    | Strong staining (+++) in epithelial cells.                                                                                                                                                  |
|                       | Testis              | Moderate (++) to strong (+++) staining in spermatogonia and spermatocytes. No staining of Sertoli cells and Leydig cells.                                                                   |
|                       | Epididymis          | Strong staining (+++) in epithelial cells.                                                                                                                                                  |
| <b>Female genital</b> | Breast              | Strong staining (+++) in luminal cells of breast glands, weak (+) or absent staining in myoepithelial cells.                                                                                |
|                       | Uterus, myometrium  | Negative.                                                                                                                                                                                   |
|                       | Uterus, ectocervix  | Weak (+) staining in the basal cell layer of squamous epithelium.                                                                                                                           |
|                       | Uterus endocervix   | Strong staining (+++) in epithelial cells.                                                                                                                                                  |
|                       | Uterus, endometrium | Strong staining (+++) in epithelial cells.                                                                                                                                                  |
|                       | Fallopian Tube      | Strong staining (+++) in epithelial cells.                                                                                                                                                  |
|                       | Ovary               | Strong (+++) staining of oocytes.                                                                                                                                                           |
|                       | Placenta            | Weak (+) to moderate (++) membranous staining in the cytotrophoblast.                                                                                                                       |
|                       | Amnion              | Weak (+) membranous staining in amnion cells.                                                                                                                                               |
|                       | Chorion             | Moderate (++) membranous staining in chorion cells.                                                                                                                                         |
| <b>Skin</b>           | Epidermis           | Negative.                                                                                                                                                                                   |
|                       | Hair follicles      | Strong staining (+++) in epithelial cells of hair follicles.                                                                                                                                |
|                       | Eccrine glands      | Strong staining (+++) in epithelial cells.                                                                                                                                                  |
|                       | Sebaceous glands    | Strong (+++) staining in peripheral germinative cells.                                                                                                                                      |

|                                 |                 |                                                                                           |
|---------------------------------|-----------------|-------------------------------------------------------------------------------------------|
| <b>Muscle/connective tissue</b> | Heart muscle    | Negative.                                                                                 |
|                                 | Skeletal muscle | Negative.                                                                                 |
|                                 | Smooth muscle   | Negative.                                                                                 |
|                                 | Vessel walls    | Negative.                                                                                 |
|                                 | Fat             | Negative.                                                                                 |
|                                 | Stroma          | Negative.                                                                                 |
|                                 | Endothelium     | Negative.                                                                                 |
| <b>Bone marrow/lymphoid</b>     | Bone marrow     | Negative.                                                                                 |
|                                 | Lymph node      | Negative.                                                                                 |
|                                 | Spleen          | Negative.                                                                                 |
|                                 | Thymus          | Weak (+) to moderate (++) staining in epithelial cells including corpuscles of Hassall's. |
|                                 | Tonsil          | Strong staining (+++) in scattered squamous epithelial cells in tonsil crypts.            |

---
