# Supplementary material for: Epithelial Cell Adhesion Molecule (EpCAM) Expression in Human Tumors: A Comparison with Pan-Cytokeratin and TROP2 in 14,832 Tumors
Source: MDPI journal article supplement (doi:10.3390/diagnostics14101044), 2024-05-17
Supplement: s1 [file s1]

|                                           |            |     | EpCAM immunostaining result |          |              |            |         |
|-------------------------------------------|------------|-----|-----------------------------|----------|--------------|------------|---------|
|                                           | HPV status | n   | negative (%)                | weak (%) | moderate (%) | strong (%) | P       |
| All squamous cell cancers                 | negative   | 286 | 20.3                        | 28.7     | 16.1         | 35.0       | <0.0001 |
|                                           | positive   | 240 | 8.3                         | 28.8     | 26.7         | 36.3       |         |
| Oral squamous cell carcinoma              | negative   | 65  | 23.1                        | 26.2     | 13.8         | 36.9       | 0.1042  |
|                                           | positive   | 13  | 15.4                        | 15.4     | 46.2         | 23.1       |         |
| Squamous cell carcinoma of the pharynx    | negative   | 22  | 4.5                         | 31.8     | 22.7         | 40.9       | 0.1898  |
|                                           | positive   | 34  | 0.0                         | 14.7     | 23.5         | 61.8       |         |
| Squamous cell carcinoma of the larynx     | negative   | 49  | 14.3                        | 18.4     | 18.4         | 49.0       | 0.0615  |
|                                           | positive   | 9   | 0.0                         | 44.4     | 0.0          | 55.6       |         |
| Squamous cell carcinoma of the cervix     | negative   | 8   | 12.5                        | 25.0     | 25.0         | 37.5       | 0.2029  |
|                                           | positive   | 66  | 0.0                         | 25.8     | 31.8         | 42.4       |         |
| Squamous cell carcinoma of the vagina     | negative   | 15  | 20.0                        | 33.3     | 20.0         | 26.7       | 0.5364  |
|                                           | positive   | 15  | 6.7                         | 26.7     | 40.0         | 26.7       |         |
| Squamous cell carcinoma of the vulva      | negative   | 54  | 7.4                         | 31.5     | 18.5         | 42.6       | 0.4257  |
|                                           | positive   | 26  | 3.8                         | 46.2     | 23.1         | 26.9       |         |
| Squamous cell carcinoma of the penis      | negative   | 30  | 46.7                        | 30.0     | 3.3          | 20.0       | 0.0642  |
|                                           | positive   | 46  | 26.1                        | 39.1     | 19.6         | 15.2       |         |
| Squamous cell carcinoma of the skin       | negative   | 38  | 34.2                        | 36.8     | 15.8         | 13.2       | 0.5821  |
|                                           | positive   | 1   | 0.0                         | 100.0    | 0.0          | 0.0        |         |
| Squamous cell carcinoma of the anal canal | negative   | 5   | 0.0                         | 40.0     | 20.0         | 40.0       | 0.5832  |
|                                           | positive   | 30  | 13.3                        | 20.0     | 26.7         | 40.0       |         |
