# Supplementary material for: Epithelial Cell Adhesion Molecule (EpCAM) Expression in Human Tumors: A Comparison with Pan-Cytokeratin and TROP2 in 14,832 Tumors
Source: MDPI journal article supplement (doi:10.3390/diagnostics14101044), 2024-05-17
Supplement: s1 [file s1]

Tumors of the skin and head &amp; neck

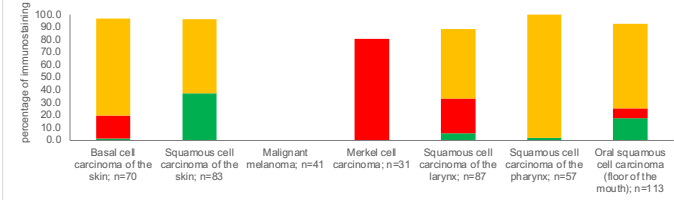

Tumors of the lung, pleura and thymus

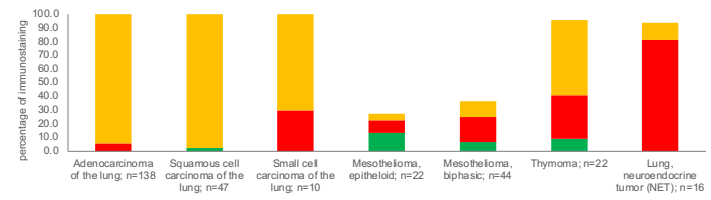

Tumors of the female genital tract and breast

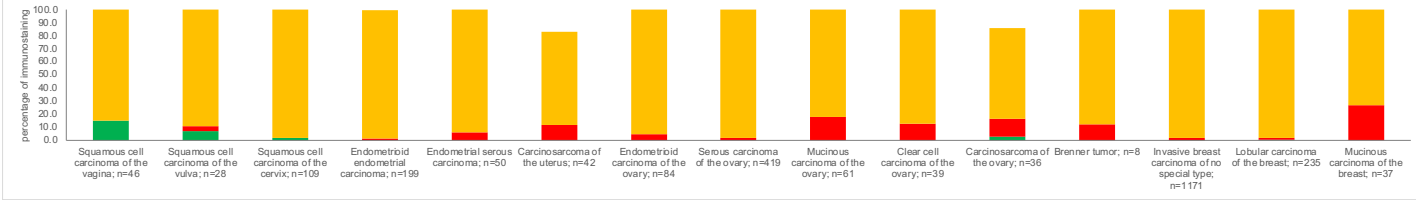

Tumors of the digestive system

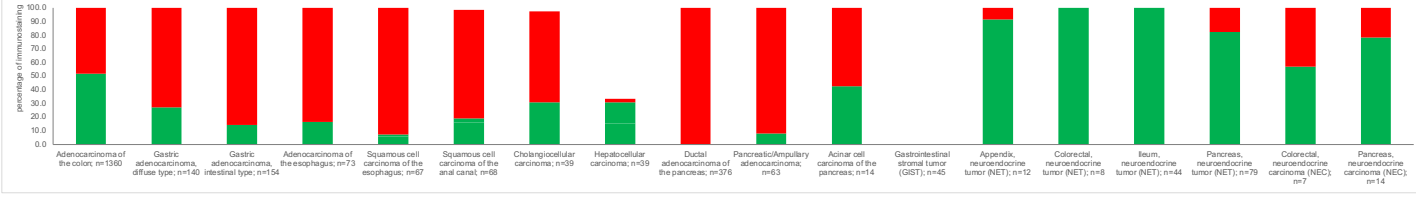

Tumors of the urinary system

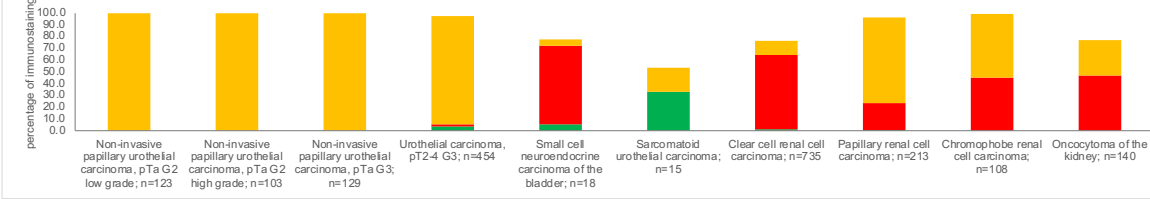

Tumors of the male genital tract

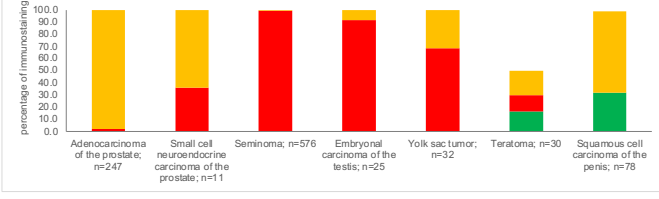

Tumors of haematopoietic and lymphoid tissues

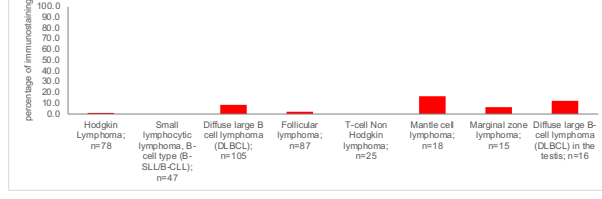

Tumors of endocrine organs

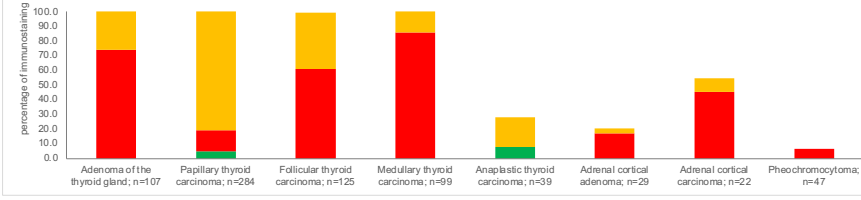

Tumors of soft tissue and bone

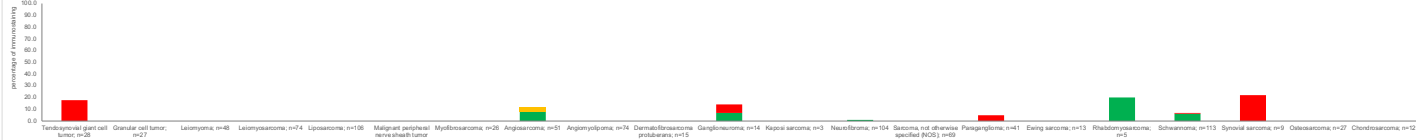

EpCAM negative/TROP2 positive

EpCAM positive/TROP2 negative

EpCAM positive/TROP2 positive
